# Supplementary material for: Mother’s dietary quality during pregnancy and offspring’s dietary quality in adolescence: Follow-up from a national birth cohort study of 19,582 mother–offspring pairs
Source: PLOS journal article supplement (doi:10.1371/journal.pmed.1002911), 2019-09-12
Supplement: S6 (10.1371/journal.pmed.1002911.s006) [file journal.pmed.1002911.s006]

**Article title:** Mother's dietary quality during pregnancy and offspring's dietary quality in adolescence: follow-up from a national birth cohort study of 19,582 mother-offspring pairs

**Author names:** Anne Ahrendt Bjerregaard, Thorhallur Ingi Halldorsson, Inge Tetens, Sjurður Frodi Olsen

**Affiliation and e-mail address of corresponding author**

Center for Fetal Programming, Department of Epidemiology Research, Statens Serum Institut, Copenhagen, Denmark, [anne@ssi.dk](mailto:anne@ssi.dk)

---

## **S1 Appendix. Sub-sample analyses**

Sub-sample analyses includes description of and results from triangular association analyses between mother—offspring HEI at pregnancy and at 14 years follow-up

### **A Text** Background, methods, and results of the triangular association analyses

With increased emphasis on obtaining more detailed information on nutritional exposure in cohort studies, we set out to examine whether asking one or both parents to fill out an additional FFQs would affect the response rate of the offspring at a 14 year follow-up within the Danish National Birth Cohort (DNBC). With the design of a randomized controlled trial (RCT) and an online questionnaire, it was possible to determine the effect from parental participation on adolescent response rate in a highly controlled setting. The RCT was initiated within the DNBC 14 year follow-up from January to May 2013. Singleton offspring ( $n = 5,829$ ) who had not taken part in the 14-year-old follow-up at the time of initiating the RCT, were identified as eligible as they were living with both parents, or living with mother and father was accessible at another address. The adolescents were randomised into three 'invitation'-groups ( $n=1,942$  in each group):

- A) Adolescents only,
- B) Adolescent plus mother,
- C) Adolescent plus mother and father.

The invitations were send by email when possible otherwise, the invitations were send by postal letter. Up to three reminders were administered to increase response rate.

We used the sub-set of DNBC participants from 'invitation'-group B to examine the triangular dietary relationship, in terms of healthy eating index (HEI), between (1) mother's diet during pregnancy, (2)

her own diet at the 14 year follow-up and (3) the relationship between these two time points with offspring own diet at 14 years. The overall aim was to explore if our estimates presented in Table 5 in the main manuscript, would be affected when taking into consideration mother own diet at the 14 year follow-up. After exclusion of implausible energy intakes ( $< 2,500$  kJ/day and  $> 25,000$  kJ/day) 595 mother-offspring pairs with a HEI score assessment 14 years after birth were eligible. These were compared with the mothers from the full study sample, who were not part of the sub-study ( $n=18,987$ )

## Results

Comparison of maternal and offspring characteristics, respectively between the two study populations are presented in **Table 1 and 2**. Mothers in the sub-study population ( $n = 595$ ) were more likely to have more children ( $p < 0.001$ ) compared to the remaining mothers from the full study population ( $n = 18,987$ ). No differences were observed for offspring characteristics. The mean HEI score (SD) in the sub-sample was 26 (8) points for mothers 14 years after pregnancy. This was significantly higher compared with the mothers mean HEI score (mothers: 23 (7) points) in the main study population ( $p < 0.001$ ). No significant differences were observed in the mean HEI scores [SD] among offspring in the RCT and in the main study (23.5 [8.7] points vs. 24.2 [8.5] points).

We found that maternal prenatal and postnatal HEI score was significantly correlated with each other and with offspring HEI score (**Figure 1**). The risk ratio (RR) estimates were in the same direction as in the full population analyses. Further adjustment for maternal postnatal HEI score at the 14 year follow-up resulted in a reduction in RR from 2.54 to 1.84 (**Table 3**).

**B Table** Maternal characteristics

|                                           | Main study<br>population<br><i>n</i> = 18,987 | Sub-study<br>population<br><i>n</i> = 595 | <i>p</i> *       |
|-------------------------------------------|-----------------------------------------------|-------------------------------------------|------------------|
| <b>Maternal characteristics</b>           | Mean (SD) or %                                |                                           |                  |
| <i>Age groups (years)</i>                 | 30.7 (4.1)                                    | 31.0 (3.9)                                | 0.08             |
| ≤25                                       | 12                                            | 10                                        | 0.13             |
| 26-30                                     | 43                                            | 40                                        |                  |
| 31-35                                     | 34                                            | 39                                        |                  |
| ≥36                                       | 11                                            | 11                                        |                  |
| <i>Pre-pregnancy BMI</i> <sup>1</sup>     | 23.3 (3.9)                                    | 23.0 (3.9)                                | 0.11             |
| Under weight                              | 4                                             | 5                                         | 0.23             |
| Normal weight                             | 67                                            | 70                                        |                  |
| Overweight and obese                      | 24                                            | 22                                        |                  |
| Missing                                   | 5                                             | 3                                         |                  |
| <i>Physical activity during pregnancy</i> |                                               |                                           | 0.09             |
| No (<1h/week)                             | 63                                            | 60                                        |                  |
| Yes 1h or more/week                       | 37                                            | 40                                        |                  |
| <i>Smoking during pregnancy</i>           |                                               |                                           | <b>0.046</b>     |
| No                                        | 79                                            | 82                                        |                  |
| Yes Occasional                            | 20                                            | 17                                        |                  |
| Missing                                   | 1                                             | 1                                         |                  |
| <i>Lactation</i>                          |                                               |                                           | 0.23             |
| ≤1m                                       | 31                                            | 29                                        |                  |
| 2-6m                                      | 20                                            | 18                                        |                  |
| ≥7m                                       | 49                                            | 53                                        |                  |
| <i>Parity</i>                             |                                               |                                           | <b>&lt;0.001</b> |
| No prior child                            | 47                                            | 37                                        |                  |
| Prior children                            | 51                                            | 64                                        |                  |
| <i>Parental education</i>                 |                                               |                                           | 0.91             |
| High                                      | 25                                            | 24                                        |                  |
| Medium                                    | 36                                            | 37                                        |                  |
| Skilled workers                           | 25                                            | 24                                        |                  |
| Unskilled/students/ unemployed            | 14                                            | 15                                        |                  |

\*One-way ANOVA for continuous and chi-squared test for categorical variables, respectively.

<sup>1</sup>BMI body mass index Underweight BMI < 18.5 kg/m<sup>2</sup>, normal weight BMI 18.5-24.9 kg/m<sup>2</sup>, Over weight BMI 25-29.9 kg/m<sup>2</sup>, obese BMI ≥ 30 kg/m<sup>2</sup>

**C Table** Offspring characteristics

|                                  | Main population | Sub-study population | P*   |
|----------------------------------|-----------------|----------------------|------|
|                                  | n=18,987        | n=595                |      |
| <b>Offspring characteristics</b> | Mean (SD) or %  |                      |      |
| Girls (%)                        | 52.6            | 52.3                 | 0.88 |
| <i>BMI</i> <sup>2</sup>          | 19.2 (2.8)      | 19.2 (2.5)           | 0.87 |
| Under weight                     | 15              | 16                   |      |
| Normal weight                    | 76              | 75                   |      |
| Overweight and obese             | 9               | 9                    |      |

BMI body mass index. \*Anova for continuous and chi-squared for categorical variables.

<sup>2</sup>Child BMI: age and sex specific classified by Cole TJ, Bellizzi MC, Flegal KM, Dietz WH. Establishing a standard definition for child overweight and obesity worldwide: international survey. BMJ. 2000;320(7244):1240-3

**D Figure** Spearman correlation coefficients ( $r$ ) between a) prenatal maternal and 14-year offspring HEI score ( $r = 0.25$ ,  $p < 0.001$ ); b) prenatal and postnatal maternal HEI score ( $r = 0.37$ ,  $p < 0.001$ ); and c) postnatal maternal and 14-year offspring HEI score ( $r = 0.29$ ,  $p < 0.001$ ). ( $n=595$ ).

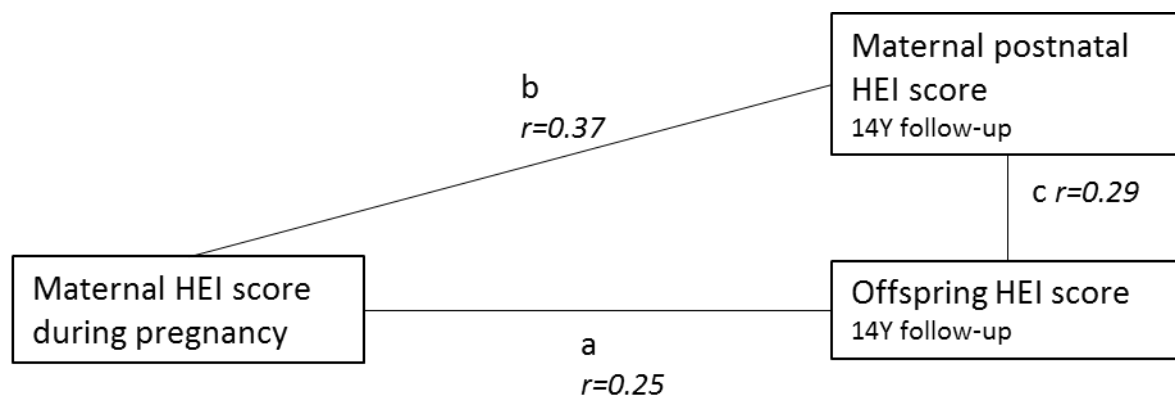

HEI: healthy eating index

**E Table** Association between maternal HEI during pregnancy and offspring HEI at 14Y before and after adjustment for mothers diet at 14 years ( $n = 595$ )

| Maternal HEI quartiles | Cases <sup>1</sup> /N | RR (model B) <sup>2</sup> | RR (model C) <sup>3</sup> |
|------------------------|-----------------------|---------------------------|---------------------------|
| Q1                     | 23/146                | 1                         | 1                         |
| Q2                     | 29 /150               | 1.18 (0.68, 2.05)         | 1.06 (0.62, 1.84)         |
| Q3                     | 37 /153               | 1.58 (0.92, 2.69)         | 1.28 (0.74, 2.20)         |
| Q4                     | 60/147                | 2.54 (1.52, 4.24)         | 1.84 (1.08, 3.14)         |
| <i>p</i> for trend     |                       | <0.001                    | <0.001                    |

<sup>1</sup> Cases=the number of offspring in Q4 according to ranking of the mother

<sup>2</sup>Adjusted for maternal age, pre-pregnancy BMI, parity, education, physical activity, smoking and alcohol intake during pregnancy, lactation, offspring energy intake, offspring sex

<sup>3</sup>Additionally adjusted for maternal postnatal diet HEI score assessed concurrently with offspring 14y after birth  
HEI, healthy eating index; Q, quartile
